# Supplementary material for: Sir2 and Reb1 antagonistically regulate nucleosome occupancy in subtelomeric X-elements and repress TERRAs by distinct mechanisms
Source: PubMed Central journal article supplement (PMC9531808; doi:10.1371/journal.pgen.1010419), 2022-09-22

### TEL8L

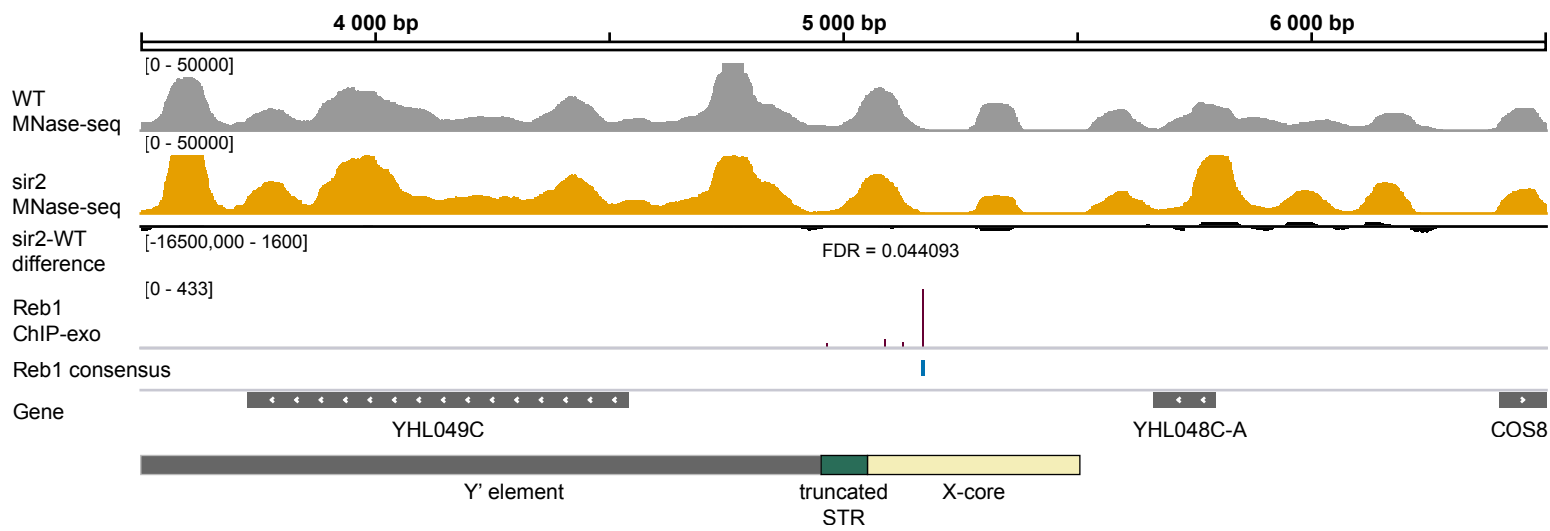

### TEL8R

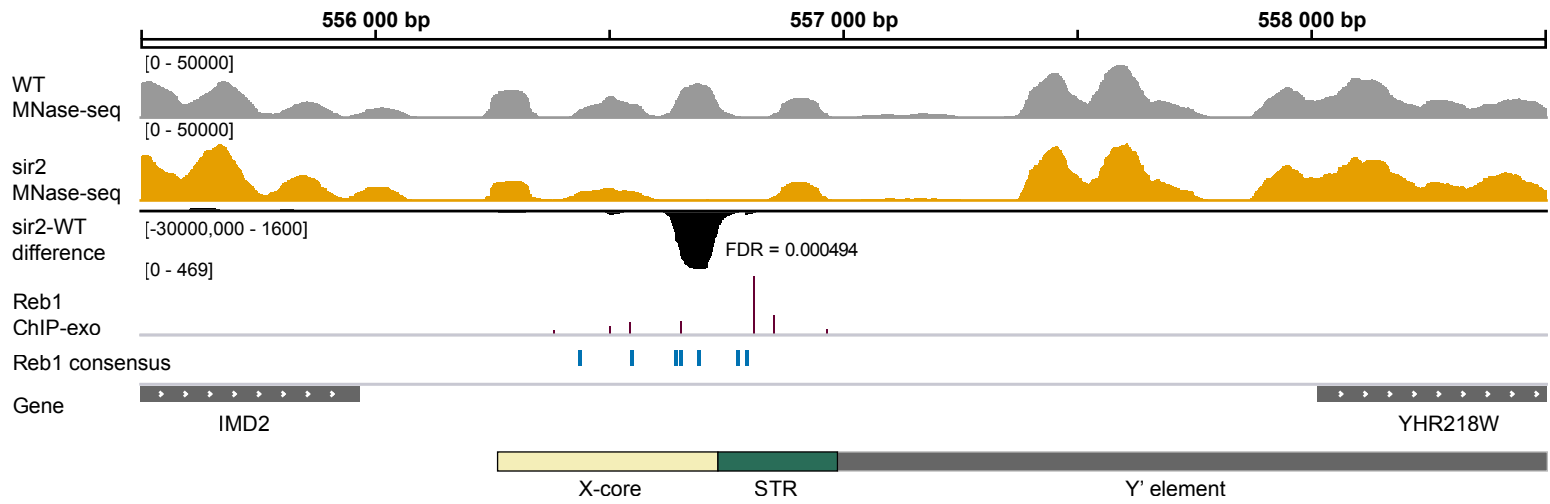

### TEL9L

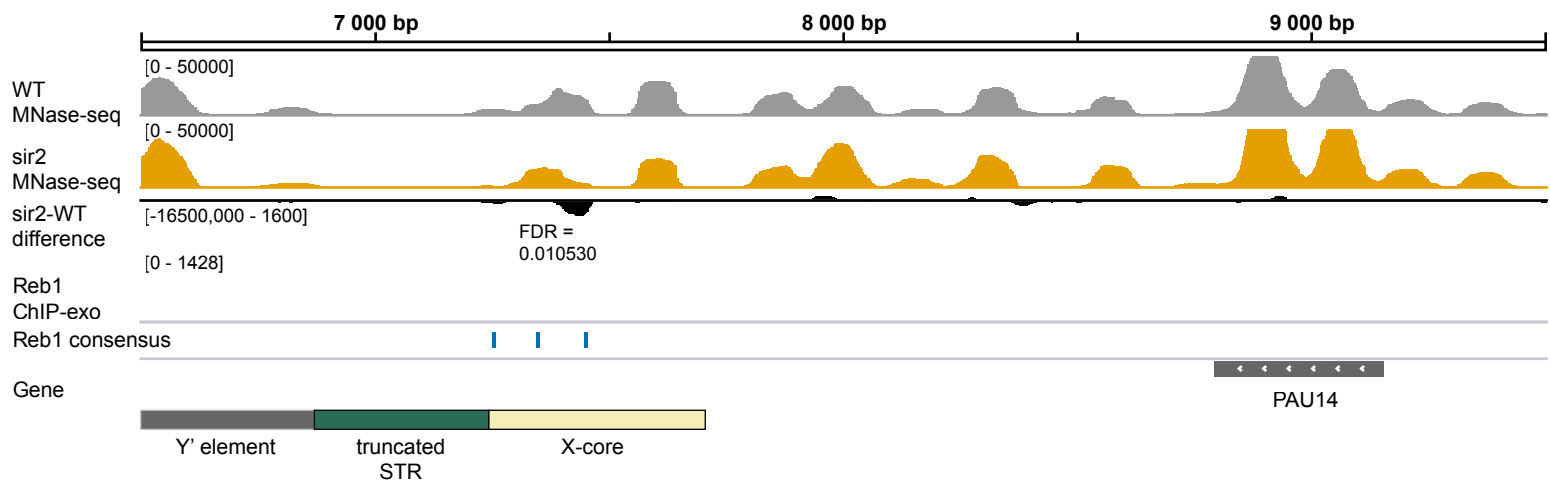

### TEL9R

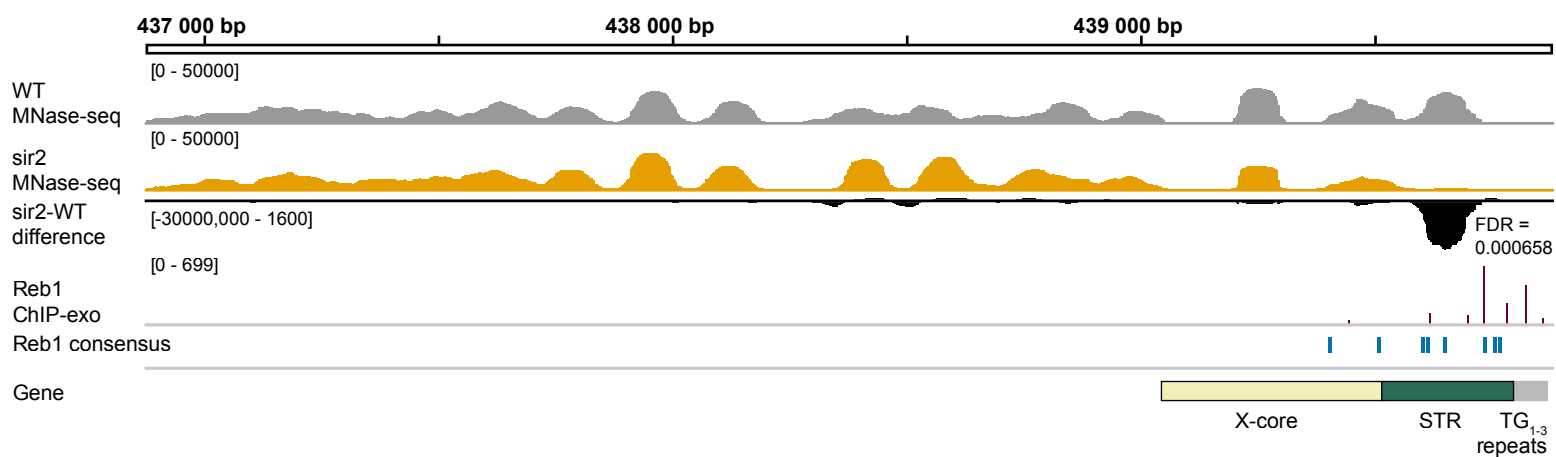

Supplement: pgen.1010419.s007.pdf [file pgen.1010419.s007.pdf]
