# Supplementary material for: Sir2 and Reb1 antagonistically regulate nucleosome occupancy in subtelomeric X-elements and repress TERRAs by distinct mechanisms
Source: PubMed Central journal article supplement (PMC9531808; doi:10.1371/journal.pgen.1010419), 2022-09-22

### TEL15L

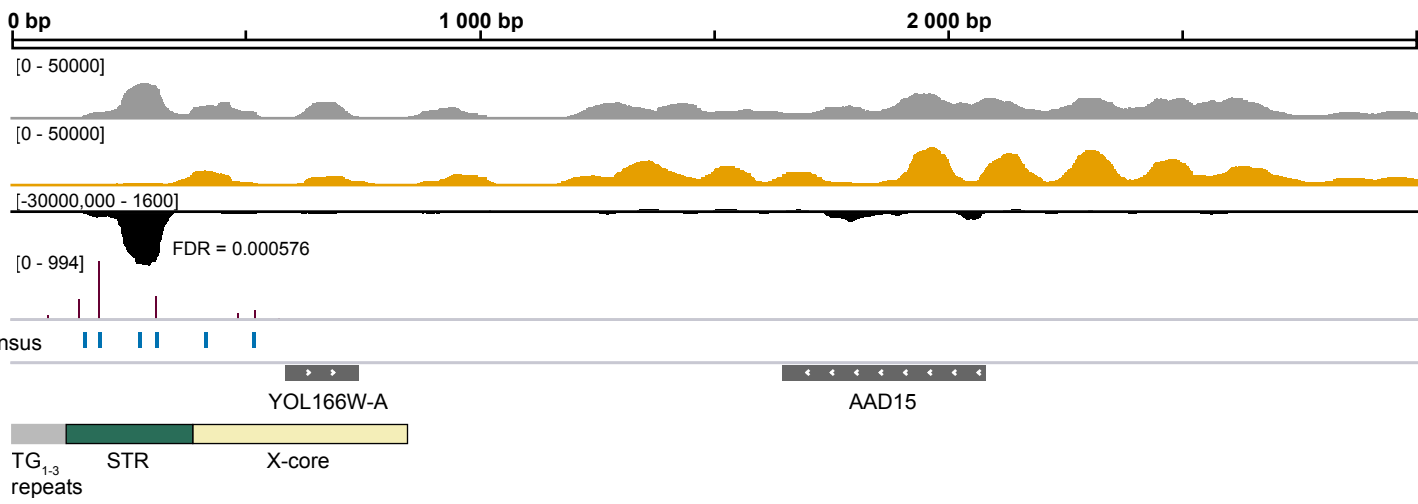

### TEL15R

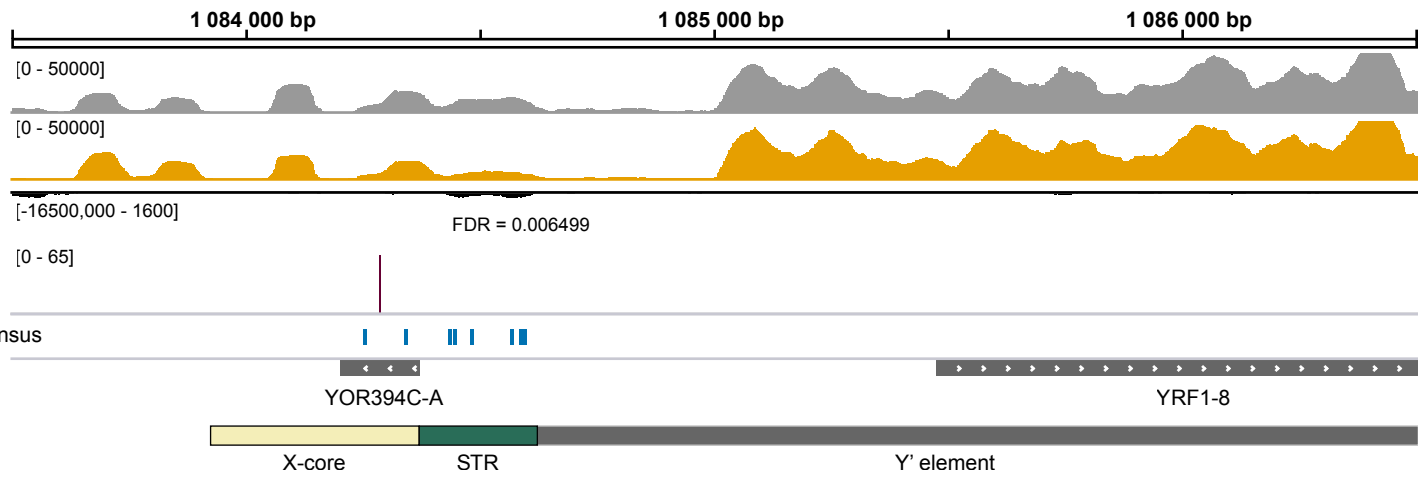

### TEL16L

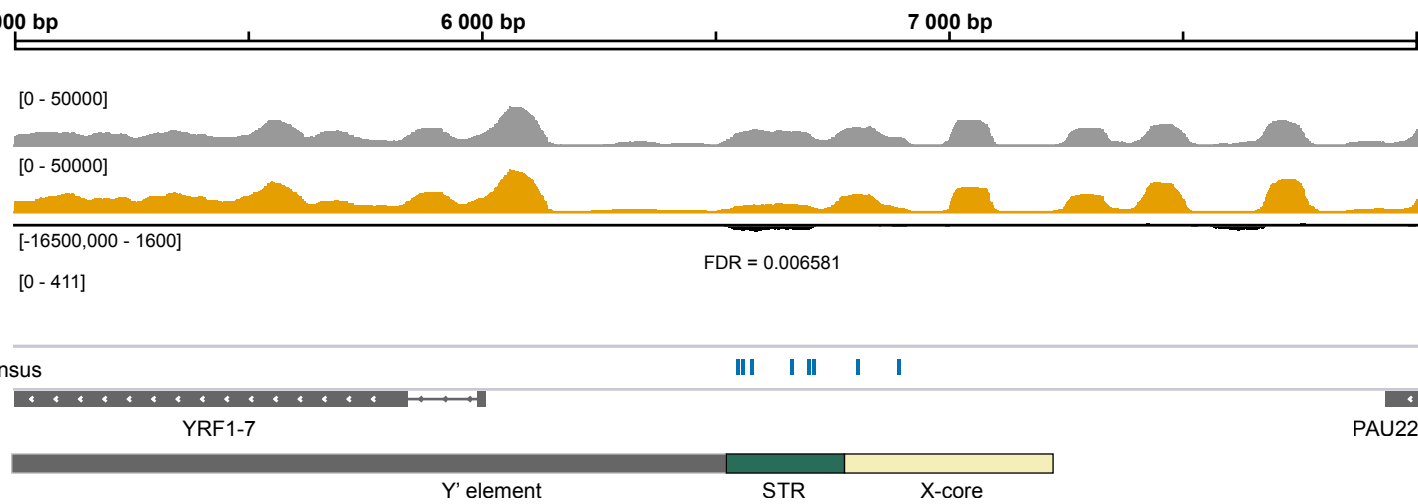

### TEL16R

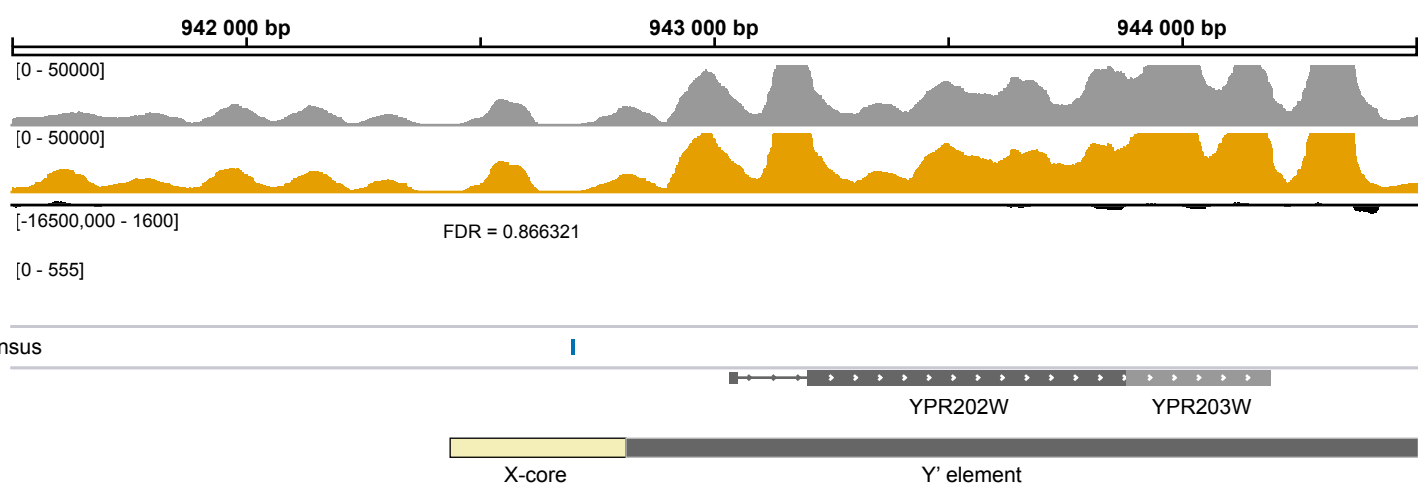

Supplement: pgen.1010419.s010.pdf [file pgen.1010419.s010.pdf]
