# Supplementary material for: Sir2 and Reb1 antagonistically regulate nucleosome occupancy in subtelomeric X-elements and repress TERRAs by distinct mechanisms
Source: PubMed Central journal article supplement (PMC9531808; doi:10.1371/journal.pgen.1010419), 2022-09-22

**A**     non-*a*/*alpha* *SIR2*     non-*a*/*alpha* *sir2*

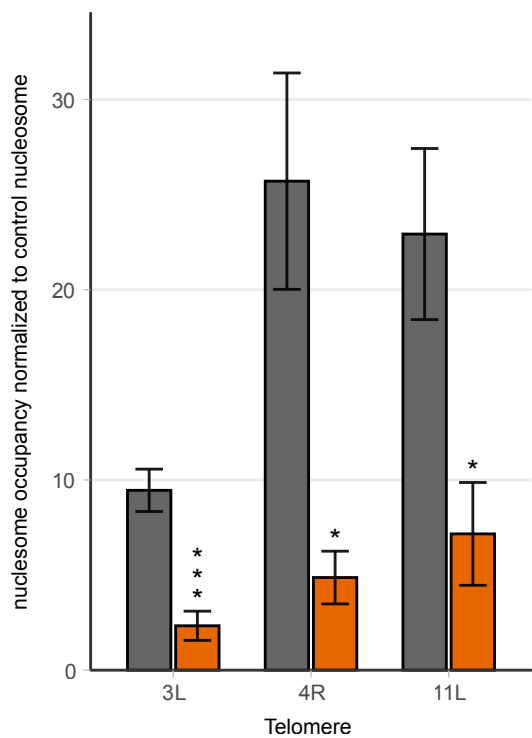

**B**     *WT*     *sir2*     *sir3*

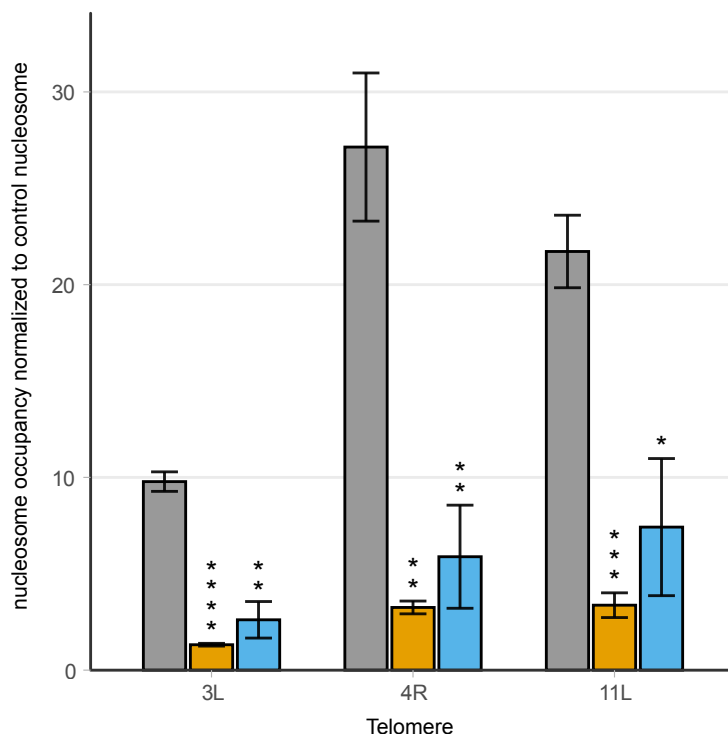

**C**     *H4K16*     *H4K16R*     *H4K16Q*

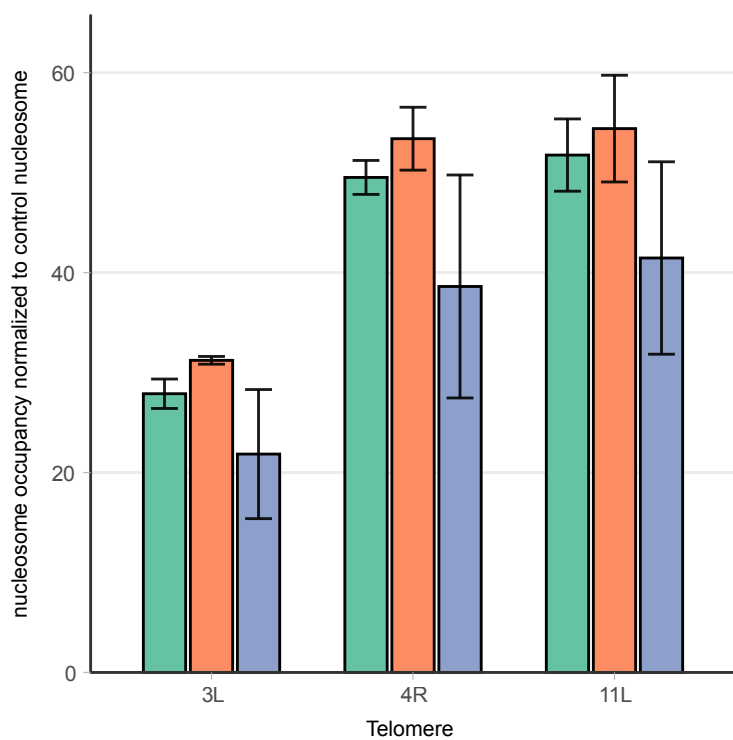

Supplement: pgen.1010419.s013.pdf [file pgen.1010419.s013.pdf]
